# Supplementary material
Source: PubMed Central journal article supplement (PMC3441041)
Supplement: jm300346w_si_002.pdf [file jm300346w_si_002.pdf]

# Supporting Information

## Druggability analysis and structural classification of bromodomain acetyl-lysine binding sites

*Lewis R. Vidler,<sup>1</sup> Nathan Brown,<sup>1</sup> Stefan Knapp<sup>2</sup> and Swen Hoelder<sup>1,\*</sup>*

<sup>1</sup>Cancer Research UK Cancer Therapeutics Unit, Division of Cancer Therapeutics, The Institute of Cancer Research, 15 Cotswold Road, Sutton, Surrey SM2 5NG, United Kingdom; <sup>2</sup>Nuffield Department of Clinical Medicine, Structural Genomics Consortium, Oxford University, Old Road Campus Research Building, Headington, Oxford OX3 7DQ, United Kingdom.

### Content:

Table S1: Details of structures filtered out with unresolved residues

Table S2: Details of structures filtered out for missing water molecules

Table S3: Output from SiteMap for structures passing filters

Table S4: Output from SiteMap for structures that have been excluded from Figure 4, Figure 5 and Table 1 but have been subsequently used in analysis

Table S5: Eight identified binding site residues, representative PDB code and median druggability for each bromodomain

Figure S1: Pockets Identified and selected binding site residues for 8 representative bromodomains from Figure 9.

**Table S1.** Bromodomain structures filtered out for unresolved binding site residues

| Bromodomain  | PDB                    | Chains  | Unresolved Residues <sup>a</sup> |
|--------------|------------------------|---------|----------------------------------|
| ATAD2A       | 3DAI                   | A       | Lysine 985, Glutamate 1017       |
| ATAD2B       | 3LXJ                   | A, B, C | Lysine 985                       |
| BRD1         | 3RCW                   | G       | Glutamate 595                    |
| BRD4(A/B)(1) | 3UW9                   | B       | Leucine 92                       |
| BRD4(A/B)(1) | 3UW9                   | C       | Leucine 94                       |
| GCN5L2       | 3D7C                   | A       | Lysine 758                       |
| MLL1         | 3LQH, 3LQI, 3LQJ       | All     | ZA-loop <sup>b</sup>             |
| PCAF         | 3GG3                   | A       | Lysine 753                       |
| TRIM33B      | 3U5M, 3U5N, 3U5O, 3U5P | All     | BC-loop                          |
| WDR9(A/B)(2) | 3Q2E                   | A       | Lysine 1399                      |

<sup>a</sup>UID residue numbering, <sup>b</sup>missing from protein construct

**Table S2.** Bromodomain structures filtered out for missing water molecules

| Bromodomain   | PDB  | Chains | Resolution (Å) |
|---------------|------|--------|----------------|
| ASH1L         | 3MQM | All    | 2.54           |
| ATAD2B        | 3LXJ | D      | 2.33           |
| BRDT(A/B)(1)  | 2RFJ | All    | 2.05           |
| PB1(A/B/C)(3) | 3K2J | All    | 2.20           |
| PB1(A/B/C)(4) | 3TLP | All    | 2.13           |
| PB1A(6)       | 3IU6 | All    | 1.79           |

**Table S3.** Details of structures included in analysis passing filters, output from SiteMap and water molecules included.

| PDB    | BRD     | Bound State | Res. (Å) | SiteScore | Size | Dscore | Volume  | Exposure | Enclosure | Contact | Phobic | Philic | Balance | Don/Acc | Water UID's <sup>a</sup>                                   |
|--------|---------|-------------|----------|-----------|------|--------|---------|----------|-----------|---------|--------|--------|---------|---------|------------------------------------------------------------|
| 3G0L   | BAZ2B   | Apo         | 2.03     | 0.718     | 39   | 0.700  | 104.615 | 0.711    | 0.612     | 0.767   | 0.690  | 0.780  | 0.885   | 0.433   | 5, 7, 20, 39, 44                                           |
| 3Q2F   | BAZ2B   | Ligand      | 2.06     | 0.672     | 31   | 0.519  | 92.267  | 0.563    | 0.694     | 0.998   | 0.400  | 1.289  | 0.310   | 0.322   | 5, 12, 14, 16, 21                                          |
| 3RCW_A | BRD1    | Apo         | 2.21     | 0.848     | 65   | 0.774  | 161.210 | 0.567    | 0.684     | 0.858   | 0.413  | 1.208  | 0.342   | 0.571   | 18, 42, 104, 105, 46(3RCW_B)                               |
| 3RCW_B | BRD1    | Apo         | 2.21     | 0.849     | 56   | 0.834  | 141.659 | 0.588    | 0.709     | 0.980   | 0.792  | 0.904  | 0.877   | 0.449   | 46, 66, 68, 18(3RCW_A),<br>42(3RCW_A)                      |
| 3RCW_C | BRD1    | Ligand      | 2.21     | 0.846     | 66   | 0.818  | 124.509 | 0.569    | 0.674     | 0.918   | 0.484  | 1.073  | 0.451   | 0.585   | 38, 45, 132, 18(3RCW_A),<br>104(3RCW_A)                    |
| 3RCW_D | BRD1    | Apo         | 2.21     | 0.748     | 50   | 0.720  | 121.765 | 0.679    | 0.624     | 0.819   | 0.414  | 0.978  | 0.423   | 0.858   | 25, 78, 162, 171, 104(3RCW_A)                              |
| 3RCW_E | BRD1    | Apo         | 2.21     | 0.788     | 45   | 0.765  | 138.572 | 0.646    | 0.689     | 0.896   | 0.690  | 0.855  | 0.807   | 0.826   | 135, 164, 42(3RCW_A),<br>104(3RCW_A), 105(3RCW_A)          |
| 3RCW_F | BRD1    | Apo         | 2.21     | 0.849     | 60   | 0.791  | 149.891 | 0.528    | 0.719     | 1.002   | 0.774  | 1.129  | 0.686   | 0.517   | 153, 18(3RCW_A),<br>42(3RCW_A), 104(3RCW_A),<br>46(3RCW_B) |
| 3RCW_H | BRD1    | Apo         | 2.21     | 0.744     | 40   | 0.669  | 113.533 | 0.619    | 0.718     | 0.978   | 0.447  | 1.092  | 0.409   | 0.684   | 98, 18(3RCW_A), 42(3RCW_A),<br>105(3RCW_A), 46(3RCW_B)     |
| 1X0J_A | BRD2(1) | Ligand      | 1.80     | 0.977     | 65   | 1.006  | 154.693 | 0.435    | 0.760     | 1.043   | 1.486  | 0.637  | 2.331   | 0.418   | 1303, 1304, 1305, 1307, 1323,                              |
| 1X0J_B | BRD2(1) | Ligand      | 1.80     | 0.875     | 59   | 0.877  | 134.456 | 0.468    | 0.699     | 1.045   | 1.146  | 0.812  | 1.411   | 0.499   | 1303, 1305, 1306, 1313, 1320                               |
| 1X0J_C | BRD2(1) | Ligand      | 1.80     | 0.800     | 48   | 0.766  | 122.790 | 0.543    | 0.711     | 1.019   | 0.993  | 0.957  | 1.038   | 0.627   | 1402, 1403, 1406, 1407, 1412                               |
| 2DVQ_A | BRD2(1) | Peptide     | 2.04     | 1.009     | 76   | 1.065  | 160.181 | 0.465    | 0.713     | 1.012   | 1.923  | 0.559  | 3.438   | 1.855   | 197, 198, 199, 222,<br>200(2DVQ_B)                         |
| 2DVQ_B | BRD2(1) | Peptide     | 2.04     | 1.009     | 88   | 1.066  | 149.548 | 0.460    | 0.676     | 0.952   | 1.325  | 0.678  | 1.953   | 1.053   | 195, 198, 200, 211, 214                                    |
| 2DVQ_C | BRD2(1) | Apo         | 2.04     | 0.789     | 41   | 0.786  | 132.055 | 0.658    | 0.670     | 0.977   | 1.219  | 0.669  | 1.822   | 0.511   | 197, 199, 203, 211, 216                                    |
| 2DVR_A | BRD2(1) | Peptide     | 2.30     | 0.976     | 68   | 1.025  | 157.094 | 0.460    | 0.711     | 1.026   | 1.905  | 0.543  | 3.508   | 1.174   | 131, 134,<br>129(2DVR_B),136(2DVR_B),<br>152(2VR_B),       |
| 2DVR_B | BRD2(1) | Peptide     | 2.30     | 0.946     | 66   | 0.978  | 152.978 | 0.532    | 0.709     | 1.003   | 1.255  | 0.647  | 1.942   | 1.036   | 129, 130, 136, 140, 152                                    |
| 2DVR_C | BRD2(1) | Apo         | 2.30     | 0.791     | 42   | 0.787  | 126.224 | 0.615    | 0.670     | 0.942   | 1.070  | 0.687  | 1.557   | 0.658   | 131, 135, 146, 149,<br>136(2DVR_B)                         |
| 2DVS_A | BRD2(1) | Peptide     | 2.04     | 0.926     | 68   | 0.953  | 155.379 | 0.460    | 0.689     | 0.995   | 1.306  | 0.724  | 1.803   | 2.893   | 130, 136, 137, 138, 205                                    |
| 2DVS_B | BRD2(1) | Peptide     | 2.04     | 0.901     | 66   | 0.916  | 156.065 | 0.548    | 0.682     | 0.965   | 1.027  | 0.789  | 1.302   | 1.276   | 129, 132, 133, 152, 167                                    |
| 2DVS_C | BRD2(1) | Apo         | 2.04     | 0.864     | 53   | 0.906  | 128.968 | 0.586    | 0.633     | 0.892   | 1.322  | 0.486  | 2.719   | 0.646   | 131, 136, 137, 145, 147                                    |
| 2YDW_A | BRD2(1) | Ligand      | 1.90     | 0.853     | 59   | 0.823  | 154.350 | 0.546    | 0.731     | 1.027   | 0.725  | 1.037  | 0.699   | 0.598   | 2022, 2043, 2044, 2065, 2088                               |
| 2YDW_B | BRD2(1) | Ligand      | 1.90     | 0.862     | 65   | 0.867  | 149.548 | 0.522    | 0.657     | 0.898   | 0.679  | 0.875  | 0.777   | 0.363   | 2016, 2026, 2027, 2038, 2059                               |
| 2YDW_C | BRD2(1) | Ligand      | 1.90     | 0.873     | 66   | 0.863  | 157.780 | 0.504    | 0.693     | 0.930   | 0.802  | 0.971  | 0.827   | 0.503   | 2018, 2037, 2038, 2052, 2074                               |
| 2YEK_A | BRD2(1) | Ligand      | 1.98     | 0.922     | 87   | 0.881  | 183.162 | 0.514    | 0.656     | 0.912   | 0.366  | 1.194  | 0.307   | 0.688   | 2027, 2070,2071, 2086, 2113                                |
| 2YEK_B | BRD2(1) | Ligand      | 1.98     | 0.862     | 56   | 0.860  | 147.833 | 0.495    | 0.703     | 0.964   | 1.168  | 0.814  | 1.435   | 0.457   | 2015, 2048, 2049, 2058, 2092                               |

|        |         |        |      |       |    |       |         |       |       |       |       |       |       |       |                                         |
|--------|---------|--------|------|-------|----|-------|---------|-------|-------|-------|-------|-------|-------|-------|-----------------------------------------|
| 2YEK_C | BRD2(1) | Ligand | 1.98 | 0.852 | 60 | 0.841 | 147.147 | 0.492 | 0.690 | 0.990 | 0.850 | 0.924 | 0.920 | 0.433 | 2023, 2046, 2047, 2063, 2088            |
| 3AQA_A | BRD2(1) | Ligand | 2.39 | 0.900 | 53 | 0.902 | 165.669 | 0.518 | 0.755 | 1.055 | 1.411 | 0.722 | 1.955 | 0.567 | 7, 10, 22, 198, 204                     |
| 3AQA_B | BRD2(1) | Apo    | 2.39 | 0.981 | 77 | 1.009 | 151.263 | 0.462 | 0.726 | 1.012 | 1.271 | 0.771 | 1.649 | 0.517 | 12, 17, 21, 57, 208                     |
| 3AQA_C | BRD2(1) | Apo    | 2.39 | 0.828 | 56 | 0.814 | 134.799 | 0.537 | 0.679 | 0.985 | 0.763 | 0.910 | 0.839 | 0.955 | 40, 48, 50, 52, 197                     |
| 4A9E_A | BRD2(1) | Ligand | 1.91 | 0.867 | 65 | 0.766 | 147.833 | 0.570 | 0.712 | 0.999 | 0.560 | 1.287 | 0.435 | 0.846 | 2027, 2059, 2060, 2087, 2117            |
| 4A9E_B | BRD2(1) | Ligand | 1.91 | 0.885 | 63 | 0.894 | 136.857 | 0.519 | 0.684 | 0.938 | 0.991 | 0.804 | 1.233 | 0.451 | 2021, 2043, 2044, 2061, 2084            |
| 4A9E_C | BRD2(1) | Ligand | 1.91 | 0.787 | 52 | 0.751 | 133.084 | 0.581 | 0.682 | 1.002 | 0.948 | 1.031 | 0.919 | 1.185 | 2017, 2029, 2030, 2040, 2060            |
| 4A9F_A | BRD2(1) | Ligand | 1.73 | 0.939 | 76 | 0.940 | 156.065 | 0.476 | 0.725 | 1.030 | 1.108 | 0.964 | 1.149 | 0.501 | 2029, 2078, 2079, 2117, 2118            |
| 4A9F_B | BRD2(1) | Ligand | 1.73 | 0.870 | 70 | 0.863 | 159.838 | 0.545 | 0.671 | 0.894 | 0.667 | 0.999 | 0.668 | 0.691 | 2021, 2051, 2052, 2073, 2098            |
| 4A9F_C | BRD2(1) | Ligand | 1.73 | 0.791 | 62 | 0.776 | 142.688 | 0.622 | 0.610 | 0.795 | 0.568 | 1.011 | 0.562 | 0.772 | 2022, 2044, 2045, 2061, 2062            |
| 4A9H_A | BRD2(1) | Ligand | 2.05 | 0.918 | 75 | 0.889 | 162.239 | 0.483 | 0.723 | 1.062 | 0.739 | 1.101 | 0.671 | 0.492 | 2027, 2060, 2061, 2076, 2077            |
| 4A9H_B | BRD2(1) | Ligand | 2.05 | 0.922 | 73 | 0.874 | 168.756 | 0.416 | 0.741 | 1.041 | 0.874 | 1.148 | 0.761 | 0.930 | 2019, 2039, 2040, 2057, 2077            |
| 4A9H_C | BRD2(1) | Ligand | 2.05 | 0.917 | 82 | 0.792 | 184.877 | 0.503 | 0.677 | 0.958 | 0.229 | 1.428 | 0.160 | 1.147 | 2014, 2032, 2033, 2045, 2068            |
| 4A9I_A | BRD2(1) | Ligand | 2.25 | 0.861 | 60 | 0.820 | 149.548 | 0.483 | 0.738 | 1.076 | 0.815 | 1.076 | 0.757 | 0.511 | 2015, 2036, 2037, 2049, 2071            |
| 4A9I_B | BRD2(1) | Ligand | 2.25 | 0.856 | 63 | 0.870 | 147.147 | 0.588 | 0.638 | 0.813 | 0.718 | 0.796 | 0.902 | 0.448 | 2016, 2032, 2033, 2051, 2070            |
| 4A9I_C | BRD2(1) | Ligand | 2.25 | 0.783 | 60 | 0.766 | 152.292 | 0.691 | 0.612 | 0.811 | 0.409 | 1.012 | 0.404 | 1.321 | 2008, 2015, 2016, 2022, 2039            |
| 4A9J_A | BRD2(1) | Ligand | 1.90 | 0.824 | 58 | 0.803 | 144.060 | 0.583 | 0.679 | 0.966 | 0.591 | 0.983 | 0.601 | 0.922 | 2027, 2051, 2052, 2068, 2096            |
| 4A9J_B | BRD2(1) | Ligand | 1.90 | 0.820 | 48 | 0.810 | 147.833 | 0.597 | 0.692 | 0.968 | 1.044 | 0.789 | 1.325 | 0.875 | 2016, 2041, 2042, 2059, 2078            |
| 4A9J_C | BRD2(1) | Ligand | 1.90 | 0.781 | 52 | 0.753 | 133.084 | 0.570 | 0.660 | 0.949 | 0.814 | 0.984 | 0.827 | 1.201 | 2013, 2026, 2027, 2036, 2056            |
| 4A9M_A | BRD2(1) | Ligand | 2.06 | 0.935 | 83 | 0.948 | 176.302 | 0.556 | 0.676 | 0.967 | 0.802 | 0.964 | 0.832 | 1.044 | 2026, 2058, 2059, 2072, 2097            |
| 4A9M_B | BRD2(1) | Ligand | 2.06 | 0.886 | 61 | 0.886 | 157.094 | 0.523 | 0.711 | 0.981 | 1.139 | 0.843 | 1.351 | 0.426 | 2018, 2039, 2040, 2058, 2081            |
| 4A9M_C | BRD2(1) | Ligand | 2.06 | 0.825 | 55 | 0.814 | 147.490 | 0.574 | 0.672 | 0.921 | 0.837 | 0.876 | 0.955 | 0.249 | 2011, 2024, 2025, 2037, 2058            |
| 4A9N_A | BRD2(1) | Ligand | 1.85 | 0.955 | 83 | 0.928 | 164.640 | 0.435 | 0.728 | 1.021 | 0.619 | 1.121 | 0.552 | 0.435 | 2018, 2050, 2051, 2065, 2087            |
| 4A9N_B | BRD2(1) | Ligand | 1.85 | 0.919 | 69 | 0.927 | 164.297 | 0.514 | 0.710 | 0.974 | 0.940 | 0.857 | 1.097 | 0.554 | 2015, 2028, 2029, 2046, 2063            |
| 4A9N_C | BRD2(1) | Ligand | 1.85 | 0.870 | 67 | 0.876 | 176.645 | 0.553 | 0.656 | 0.921 | 0.745 | 0.879 | 0.847 | 1.056 | 2013, 2025, 2026, 2034, 2051            |
| 4A9O_A | BRD2(1) | Ligand | 1.78 | 0.948 | 79 | 0.853 | 160.181 | 0.415 | 0.742 | 1.061 | 0.514 | 1.313 | 0.392 | 0.656 | 2035, 2081, 2082, 2104, 2136            |
| 4A9O_B | BRD2(1) | Ligand | 1.78 | 0.914 | 72 | 0.835 | 160.867 | 0.395 | 0.736 | 0.995 | 0.627 | 1.239 | 0.506 | 0.642 | 2023, 2045, 2046, 2072, 2100            |
| 4A9O_C | BRD2(1) | Ligand | 1.78 | 0.901 | 75 | 0.837 | 161.553 | 0.472 | 0.696 | 0.951 | 0.462 | 1.210 | 0.382 | 0.605 | 2015, 2035, 2036, 2052, 2079            |
| 4ALH_A | BRD2(1) | Ligand | 1.97 | 0.962 | 86 | 0.894 | 162.239 | 0.456 | 0.720 | 1.002 | 0.495 | 1.258 | 0.394 | 0.835 | 2031, 2065, 2066, 2082, 2103            |
| 4ALH_B | BRD2(1) | Ligand | 1.97 | 0.970 | 86 | 0.913 | 163.954 | 0.415 | 0.733 | 1.004 | 0.701 | 1.224 | 0.573 | 0.424 | 2017, 2033, 2034, 2052, 2072            |
| 4ALH_C | BRD2(1) | Ligand | 1.97 | 0.888 | 70 | 0.840 | 157.437 | 0.481 | 0.709 | 1.021 | 0.560 | 1.141 | 0.491 | 0.568 | 2013, 2028, 2029, 2040, 2058            |
| 2DVV   | BRD2(2) | Ligand | 1.80 | 0.917 | 70 | 0.946 | 156.751 | 0.527 | 0.666 | 0.924 | 1.039 | 0.737 | 1.410 | 0.312 | 457, 460, 467, 590, 4(3ONI)             |
| 2E3K_A | BRD2(2) | Apo    | 2.30 | 0.946 | 78 | 0.989 | 172.529 | 0.602 | 0.651 | 0.879 | 0.944 | 0.712 | 1.327 | 0.977 | 462, 463, 496, 470(2E3K_B), 473(2E3K_B) |

|        |              |         |      |       |    |       |         |       |       |       |       |       |       |       |                                                     |
|--------|--------------|---------|------|-------|----|-------|---------|-------|-------|-------|-------|-------|-------|-------|-----------------------------------------------------|
| 2E3K_B | BRD2(2)      | Peptide | 2.30 | 0.692 | 22 | 0.643 | 102.557 | 0.662 | 0.725 | 0.948 | 1.308 | 0.715 | 1.831 | 0.811 | 459, 465, 470, 473, 496(2E3K_A)                     |
| 2E3K_C | BRD2(2)      | Peptide | 2.30 | 0.845 | 56 | 0.863 | 160.524 | 0.624 | 0.643 | 0.863 | 0.794 | 0.694 | 1.144 | 0.870 | 459, 460, 464, 508, 473(2E3K_B)                     |
| 2E3K_D | BRD2(2)      | Peptide | 2.30 | 0.927 | 71 | 0.983 | 162.239 | 0.606 | 0.624 | 0.831 | 1.281 | 0.563 | 2.276 | 1.023 | 459, 461, 496(2E3K_A),<br>470(2E3K_B), 473 (2E3K_B) |
| 3ONI   | BRD2(2)      | Ligand  | 1.61 | 0.803 | 55 | 0.809 | 151.263 | 0.621 | 0.614 | 0.836 | 0.587 | 0.786 | 0.748 | 0.400 | 3, 4, 30, 34, 460                                   |
| 2NXB_A | BRD3(1)      | Apo     | 1.40 | 0.794 | 46 | 0.798 | 142.345 | 0.657 | 0.641 | 0.760 | 0.965 | 0.688 | 1.402 | 0.559 | 325, 337, 351, 382, 386                             |
| 2NXB_B | BRD3(1)      | Apo     | 1.40 | 0.967 | 66 | 1.009 | 162.925 | 0.538 | 0.721 | 0.999 | 1.846 | 0.575 | 3.209 | 0.944 | 337, 342, 340, 345, 457                             |
| 3S9I   | BRD3(1)      | Ligand  | 2.06 | 0.871 | 69 | 0.862 | 170.471 | 0.507 | 0.678 | 0.971 | 0.508 | 1.000 | 0.508 | 0.688 | 5, 6, 12, 15, 147                                   |
| 2OO1_A | BRD3(2)      | Apo     | 1.70 | 0.917 | 63 | 0.944 | 163.611 | 0.526 | 0.692 | 0.988 | 1.445 | 0.667 | 2.167 | 0.824 | 2970, 2973, 2977, 2982, 2985                        |
| 2OO1_B | BRD3(2)      | Apo     | 1.70 | 0.795 | 44 | 0.800 | 159.152 | 0.633 | 0.648 | 0.866 | 0.764 | 0.650 | 1.175 | 0.385 | 2969, 2970, 2980, 2984, 2992                        |
| 2OO1_C | BRD3(2)      | Apo     | 1.70 | 0.933 | 67 | 0.986 | 166.698 | 0.573 | 0.650 | 0.883 | 1.548 | 0.532 | 2.909 | 0.660 | 5099, 5100, 5103, 5107, 5110                        |
| 2OO1_D | BRD3(2)      | Apo     | 1.70 | 0.895 | 70 | 0.904 | 165.326 | 0.542 | 0.674 | 0.949 | 0.740 | 0.880 | 0.841 | 0.369 | 2970, 2974, 2977, 2081, 2997                        |
| 3S92   | BRD3(2)      | Ligand  | 1.36 | 0.929 | 65 | 0.966 | 187.964 | 0.504 | 0.681 | 0.979 | 1.320 | 0.616 | 2.141 | 0.466 | 2, 5, 10, 19, 20                                    |
| 2OSS   | BRD4(A/B)(1) | Apo     | 1.35 | 0.891 | 59 | 0.938 | 131.026 | 0.590 | 0.637 | 0.850 | 1.621 | 0.508 | 3.192 | 0.732 | 311, 320, 326, 334, 2101(2YEL)                      |
| 2YEL   | BRD4(A/B)(1) | Ligand  | 1.65 | 0.854 | 53 | 0.854 | 133.770 | 0.470 | 0.699 | 0.988 | 1.239 | 0.766 | 1.618 | 0.297 | 2101, 2126, 2127, 2135, 2167                        |
| 3MUK   | BRD4(A/B)(1) | Peptide | 1.75 | 0.973 | 68 | 1.016 | 144.060 | 0.414 | 0.719 | 1.029 | 2.064 | 0.583 | 3.541 | 0.601 | 2, 3, 4, 5, 169                                     |
| 3MUL   | BRD4(A/B)(1) | Peptide | 1.65 | 0.938 | 70 | 0.992 | 173.215 | 0.591 | 0.644 | 0.907 | 1.694 | 0.556 | 3.045 | 1.355 | 2, 3, 4, 5, 169                                     |
| 3MXF   | BRD4(A/B)(1) | Ligand  | 1.60 | 0.934 | 64 | 0.976 | 143.031 | 0.511 | 0.683 | 0.928 | 1.802 | 0.570 | 3.160 | 0.577 | 9, 12, 15, 33, 209                                  |
| 3P5O   | BRD4(A/B)(1) | Ligand  | 1.60 | 0.942 | 63 | 0.990 | 143.374 | 0.533 | 0.685 | 0.907 | 1.590 | 0.512 | 3.106 | 0.763 | 9, 10, 27, 29, 33                                   |
| 3SVF   | BRD4(A/B)(1) | Ligand  | 1.98 | 0.884 | 60 | 0.886 | 133.084 | 0.459 | 0.709 | 1.009 | 1.236 | 0.820 | 1.508 | 0.243 | 1, 8, 13, 31, 54                                    |
| 3SVG   | BRD4(A/B)(1) | Ligand  | 1.68 | 0.933 | 86 | 0.963 | 219.177 | 0.664 | 0.632 | 0.900 | 0.815 | 0.885 | 0.921 | 0.725 | 3, 8, 18, 22, 40                                    |
| 3JVJ   | BRD4(A/B)(1) | Ligand  | 1.55 | 0.985 | 83 | 1.049 | 176.645 | 0.605 | 0.646 | 0.853 | 1.311 | 0.599 | 2.190 | 1.172 | 9, 10, 11, 12, 172                                  |
| 3JVK   | BRD4(A/B)(1) | Ligand  | 1.80 | 0.890 | 62 | 0.924 | 143.374 | 0.622 | 0.646 | 0.844 | 1.193 | 0.625 | 1.909 | 0.519 | 6, 14, 15, 16, 17                                   |
| 3U5J   | BRD4(A/B)(1) | Ligand  | 1.60 | 0.918 | 86 | 0.948 | 197.225 | 0.650 | 0.612 | 0.858 | 0.745 | 0.893 | 0.834 | 0.510 | 7, 11, 16, 170, 178                                 |
| 3U5K_A | BRD4(A/B)(1) | Ligand  | 1.80 | 0.927 | 75 | 0.955 | 181.447 | 0.583 | 0.661 | 0.958 | 1.042 | 0.785 | 1.327 | 0.650 | 5, 188, 198, 175(3U5K_C),<br>204(3U5K_C)            |
| 3U5K_B | BRD4(A/B)(1) | Ligand  | 1.80 | 0.861 | 54 | 0.866 | 139.258 | 0.530 | 0.694 | 0.969 | 1.231 | 0.741 | 1.663 | 0.776 | 1, 4, 9, 169, 171(3U5K_C)                           |
| 3U5K_C | BRD4(A/B)(1) | Ligand  | 1.80 | 0.924 | 72 | 0.864 | 143.717 | 0.419 | 0.750 | 1.042 | 0.900 | 1.178 | 0.764 | 0.386 | 28, 171, 175, 186, 204                              |
| 3U5K_D | BRD4(A/B)(1) | Ligand  | 1.80 | 0.857 | 67 | 0.844 | 143.374 | 0.538 | 0.676 | 0.955 | 0.859 | 1.014 | 0.846 | 0.583 | 37, 170, 187, 175(3U5K_C),<br>186(3U5K_C)           |
| 3U5L   | BRD4(A/B)(1) | Ligand  | 1.39 | 0.869 | 62 | 0.881 | 138.229 | 0.534 | 0.663 | 0.872 | 1.175 | 0.788 | 1.490 | 0.239 | 3, 9, 13, 16, 219                                   |
| 3UVW   | BRD4(A/B)(1) | Peptide | 1.37 | 0.921 | 81 | 0.945 | 217.805 | 0.667 | 0.641 | 0.913 | 0.827 | 0.875 | 0.946 | 0.700 | 4, 11, 15, 21, 170                                  |
| 3UVX   | BRD4(A/B)(1) | Peptide | 1.91 | 0.939 | 76 | 0.965 | 172.186 | 0.566 | 0.680 | 0.983 | 0.890 | 0.804 | 1.107 | 0.879 | 4, 6, 10, 21, 41                                    |
| 3UVY   | BRD4(A/B)(1) | Peptide | 2.02 | 0.913 | 64 | 0.912 | 137.886 | 0.423 | 0.736 | 1.039 | 1.079 | 0.863 | 1.250 | 0.465 | 11, 20, 26, 30, 170                                 |
| 3UW9_A | BRD4(A/B)(1) | Peptide | 2.30 | 0.913 | 78 | 0.904 | 182.476 | 0.439 | 0.696 | 1.047 | 0.681 | 1.054 | 0.646 | 0.808 | 2, 12, 38, 169, 173                                 |

|        |              |         |      |       |     |       |         |       |       |       |       |       |       |       |                                           |
|--------|--------------|---------|------|-------|-----|-------|---------|-------|-------|-------|-------|-------|-------|-------|-------------------------------------------|
| 3UW9_D | BRD4(A/B)(1) | Peptide | 2.30 | 0.834 | 55  | 0.806 | 142.688 | 0.518 | 0.718 | 1.031 | 0.984 | 0.986 | 0.997 | 0.293 | 8, 15, 177, 178, 169(3UW9_A)              |
| 3ZYU_A | BRD4(A/B)(1) | Ligand  | 1.50 | 0.934 | 80  | 0.976 | 213.003 | 0.631 | 0.631 | 0.885 | 0.725 | 0.748 | 0.968 | 0.522 | 2100, 2136, 2137, 2145, 2178              |
| 3ZYU_B | BRD4(A/B)(1) | Ligand  | 1.50 | 0.918 | 71  | 0.896 | 167.041 | 0.418 | 0.748 | 1.084 | 0.897 | 1.059 | 0.847 | 0.325 | 2077, 2108, 2109, 2120, 2153              |
| 4A9L   | BRD4(A/B)(1) | Ligand  | 1.60 | 1.006 | 102 | 1.062 | 220.549 | 0.622 | 0.636 | 0.905 | 0.964 | 0.795 | 1.212 | 0.612 | 2094, 2130, 2131, 2146, 2181              |
| 4E96   | BRD4(A/B)(1) | Ligand  | 1.92 | 0.862 | 59  | 0.852 | 135.828 | 0.572 | 0.706 | 0.969 | 1.143 | 0.902 | 1.268 | 0.610 | 308, 309, 315, 326, 333                   |
| 2DWW   | BRD4(A/B)(2) | Apo     | 1.80 | 0.809 | 53  | 0.835 | 147.147 | 0.688 | 0.593 | 0.845 | 0.887 | 0.629 | 1.411 | 1.906 | 207, 209, 221, 224, 11(2OOU)              |
| 2OOU   | BRD4(A/B)(2) | Apo     | 1.89 | 0.816 | 48  | 0.819 | 170.814 | 0.667 | 0.663 | 0.903 | 0.915 | 0.706 | 1.296 | 0.701 | 8, 11, 15, 147, 148                       |
| 2YEM_A | BRD4(A/B)(2) | Ligand  | 2.30 | 0.890 | 67  | 0.901 | 172.529 | 0.544 | 0.672 | 0.985 | 0.975 | 0.831 | 1.172 | 0.842 | 2019, 2033, 2034, 2039, 2062              |
| 2YEM_B | BRD4(A/B)(2) | Ligand  | 2.30 | 0.817 | 64  | 0.811 | 180.418 | 0.644 | 0.620 | 0.878 | 0.541 | 0.961 | 0.563 | 0.628 | 2005, 2020, 2021, 2024, 2034              |
| 3JVL   | BRD4(A/B)(2) | Apo     | 1.20 | 0.914 | 70  | 0.939 | 168.413 | 0.521 | 0.668 | 0.920 | 0.739 | 0.763 | 0.968 | 0.569 | 4, 5, 15, 20, 26                          |
| 3JVM   | BRD4(A/B)(2) | Apo     | 1.20 | 0.895 | 65  | 0.897 | 167.727 | 0.522 | 0.702 | 0.999 | 0.980 | 0.863 | 1.135 | 0.611 | 3, 4, 10, 72, 468                         |
| 3HME_A | BRD9         | Apo     | 2.23 | 0.850 | 66  | 0.858 | 130.340 | 0.548 | 0.630 | 0.840 | 0.611 | 0.872 | 0.700 | 0.870 | 9, 138, 141, 160, 163(3HME_B)             |
| 3HME_B | BRD9         | Apo     | 2.23 | 0.786 | 50  | 0.777 | 140.973 | 0.618 | 0.639 | 0.829 | 0.552 | 0.832 | 0.663 | 0.577 | 4, 7, 163, 164, 169                       |
| 3NXB_A | CECR2        | Apo     | 1.83 | 0.964 | 73  | 1.015 | 125.881 | 0.532 | 0.676 | 0.989 | 1.592 | 0.594 | 2.679 | 1.345 | 2, 30, 171, 172, 173                      |
| 3NXB_B | CECR2        | Apo     | 1.83 | 0.958 | 86  | 0.994 | 170.128 | 0.530 | 0.652 | 0.848 | 0.727 | 0.826 | 0.881 | 0.648 | 5, 11, 21, 28, 36                         |
| 3DWY_A | CREBBP       | Apo     | 1.98 | 0.728 | 41  | 0.658 | 109.074 | 0.568 | 0.685 | 0.967 | 0.625 | 1.089 | 0.574 | 0.716 | 1199, 1210, 1211, 1213, 1246              |
| 3DWY_B | CREBBP       | Apo     | 1.98 | 0.768 | 43  | 0.763 | 136.171 | 0.672 | 0.637 | 0.844 | 0.988 | 0.723 | 1.366 | 0.887 | 4, 76, 85, 130, 160                       |
| 3PIC_A | CREBBP       | Peptide | 1.82 | 0.754 | 45  | 0.722 | 111.818 | 0.587 | 0.661 | 0.929 | 0.947 | 0.935 | 1.013 | 0.279 | 3, 4, 5, 18, 44                           |
| 3PIC_B | CREBBP       | Peptide | 1.82 | 0.870 | 55  | 0.892 | 131.026 | 0.574 | 0.671 | 0.913 | 1.544 | 0.636 | 2.427 | 1.067 | 23, 32, 47, 49, 72                        |
| 3PID_A | CREBBP       | Ligand  | 1.86 | 0.730 | 41  | 0.688 | 117.992 | 0.610 | 0.666 | 0.922 | 0.796 | 0.961 | 0.828 | 0.367 | 7, 9, 13, 18, 42 (3PID_B)                 |
| 3PID_B | CREBBP       | Ligand  | 1.86 | 0.802 | 47  | 0.795 | 126.224 | 0.580 | 0.669 | 0.922 | 0.962 | 0.769 | 1.250 | 0.621 | 36, 42, 56, 76, 7 (3PID_A)                |
| 3PIE_A | CREBBP       | Ligand  | 1.80 | 0.747 | 40  | 0.707 | 117.992 | 0.619 | 0.688 | 0.964 | 0.865 | 0.916 | 0.944 | 0.544 | 15, 18, 21, 28, 88                        |
| 3PIE_B | CREBBP       | Ligand  | 1.80 | 0.827 | 53  | 0.821 | 137.886 | 0.569 | 0.675 | 0.927 | 1.007 | 0.824 | 1.222 | 0.716 | 12, 27, 32, 81, 117                       |
| 3PIF_A | CREBBP       | Ligand  | 1.63 | 0.857 | 68  | 0.843 | 120.736 | 0.514 | 0.674 | 0.962 | 0.570 | 1.031 | 0.553 | 0.425 | 4, 7, 11, 18, 1200                        |
| 3PIF_B | CREBBP       | Ligand  | 1.63 | 0.757 | 43  | 0.711 | 115.248 | 0.598 | 0.701 | 0.996 | 0.771 | 1.000 | 0.770 | 0.616 | 22, 39, 45, 1199, 1200                    |
| 3SVH_A | CREBBP       | Ligand  | 1.80 | 0.812 | 51  | 0.817 | 125.195 | 0.602 | 0.641 | 0.888 | 0.865 | 0.732 | 1.181 | 0.551 | 7, 16, 18, 27, 23(3SVH_B)                 |
| 3SVH_B | CREBBP       | Ligand  | 1.80 | 0.820 | 56  | 0.824 | 117.992 | 0.566 | 0.636 | 0.869 | 0.725 | 0.802 | 0.904 | 0.463 | 20, 23, 45, 102, 144                      |
| 4A9K_A | CREBBP       | Ligand  | 1.81 | 0.717 | 35  | 0.669 | 115.591 | 0.624 | 0.688 | 0.996 | 0.809 | 0.921 | 0.879 | 0.287 | 2050, 2066, 2067, 2082, 2083              |
| 4A9K_B | CREBBP       | Ligand  | 1.81 | 0.787 | 42  | 0.733 | 132.741 | 0.523 | 0.757 | 1.126 | 1.031 | 1.015 | 1.015 | 0.406 | 2041, 2059, 2070, 2058, 2088              |
| 3I3J_A | EP300        | Apo     | 2.33 | 0.745 | 42  | 0.671 | 102.557 | 0.517 | 0.702 | 0.981 | 0.669 | 1.103 | 0.606 | 0.497 | 6, 105, 126, 145, 181(3I3J_C)             |
| 3I3J_B | EP300        | Apo     | 2.33 | 0.791 | 46  | 0.756 | 109.760 | 0.495 | 0.708 | 1.049 | 1.074 | 0.940 | 1.142 | 0.461 | 81, 99, 205, 373, 108(3I3J_C)             |
| 3I3J_C | EP300        | Apo     | 2.33 | 0.782 | 41  | 0.721 | 112.161 | 0.438 | 0.766 | 1.098 | 1.002 | 1.044 | 0.960 | 0.230 | 72, 108, 181, 304, 353                    |
| 3I3J_D | EP300        | Apo     | 2.33 | 0.767 | 40  | 0.690 | 106.330 | 0.467 | 0.752 | 1.080 | 1.105 | 1.090 | 1.014 | 0.248 | 59, 218, 322, 181(3I3J_C),<br>304(3I3J_C) |

|        |               |         |      |       |    |       |         |       |       |       |       |       |       |       |                                                                      |
|--------|---------------|---------|------|-------|----|-------|---------|-------|-------|-------|-------|-------|-------|-------|----------------------------------------------------------------------|
| 3I3J_E | EP300         | Apo     | 2.33 | 0.748 | 48 | 0.711 | 113.190 | 0.571 | 0.650 | 0.919 | 0.812 | 1.013 | 0.801 | 0.422 | 14, 107, 134, 179, 224                                               |
| 3I3J_F | EP300         | Apo     | 2.33 | 0.808 | 45 | 0.746 | 98.098  | 0.423 | 0.771 | 1.062 | 1.257 | 1.065 | 1.180 | 0.167 | 72(3I3J_C), 108(3I3J_C),<br>181(3I3J_C), 304(3I3J_C),<br>353(3I3J_C) |
| 3I3J_G | EP300         | Apo     | 2.33 | 0.780 | 36 | 0.706 | 102.214 | 0.379 | 0.807 | 1.180 | 1.079 | 1.049 | 1.028 | 0.348 | 5, 24, 58, 62, 217                                                   |
| 3I3J_H | EP300         | Apo     | 2.33 | 0.824 | 51 | 0.825 | 102.900 | 0.528 | 0.666 | 0.916 | 1.148 | 0.755 | 1.522 | 0.226 | 27, 108(3I3J_C), 181(3I3J_C),<br>304(3I3J_C), 353(3I3J_C)            |
| 3I3J_I | EP300         | Apo     | 2.33 | 0.764 | 34 | 0.628 | 103.586 | 0.469 | 0.803 | 1.137 | 0.891 | 1.234 | 0.722 | 0.213 | 54, 102, 180, 192, 281                                               |
| 3I3J_J | EP300         | Apo     | 2.33 | 0.786 | 42 | 0.736 | 100.499 | 0.475 | 0.750 | 0.987 | 1.033 | 0.993 | 1.041 | 0.149 | 7, 30, 80, 195, 353(3I3J_C)                                          |
| 3I3J_K | EP300         | Apo     | 2.33 | 0.755 | 39 | 0.703 | 108.045 | 0.500 | 0.726 | 1.040 | 0.568 | 0.980 | 0.580 | 0.513 | 4, 135, 163, 108(3I3J_C),<br>181(3I3J_C)                             |
| 3I3J_L | EP300         | Apo     | 2.33 | 0.804 | 39 | 0.794 | 104.272 | 0.519 | 0.712 | 0.966 | 1.157 | 0.673 | 1.718 | 0.212 | 72(3I3J_C), 108(3I3J_C),<br>181(3I3J_C), 304(3I3J_C),<br>353(3I3J_C) |
| 2F6J_A | FALZ(A/B)     | Apo     | 2.00 | 0.915 | 67 | 0.949 | 142.002 | 0.591 | 0.663 | 0.896 | 1.208 | 0.670 | 1.802 | 0.915 | 1007, 1010, 1013, 1039, 1045                                         |
| 2F6J_B | FALZ(A/B)     | Apo     | 2.00 | 0.842 | 53 | 0.863 | 149.548 | 0.637 | 0.642 | 0.845 | 1.111 | 0.634 | 1.753 | 0.984 | 1008, 1026, 1032, 1035,<br>1007(2F6J_A)                              |
| 2F6J_C | FALZ(A/B)     | Apo     | 2.00 | 0.795 | 47 | 0.793 | 152.978 | 0.671 | 0.649 | 0.860 | 0.922 | 0.737 | 1.250 | 0.890 | 1012, 1044, 1007(2F6J_A),<br>1010(2F6J_A), 1013(2F6J_A)              |
| 2F6N_A | FALZ(A/B)     | Apo     | 2.00 | 0.767 | 48 | 0.728 | 153.664 | 0.613 | 0.679 | 0.957 | 0.572 | 1.012 | 0.565 | 0.470 | 1006, 1011, 1023, 1032, 1035                                         |
| 2F6N_B | FALZ(A/B)     | Apo     | 2.00 | 0.897 | 66 | 0.938 | 152.292 | 0.566 | 0.630 | 0.832 | 1.155 | 0.625 | 1.847 | 0.744 | 1012, 1025, 1059, 1071,<br>1032(2F6N_A)                              |
| 2FSA_A | FALZ(A/B)     | Apo     | 1.90 | 0.916 | 71 | 0.962 | 146.461 | 0.618 | 0.628 | 0.822 | 1.041 | 0.634 | 1.643 | 0.955 | 505, 513, 516, 529, 1045(2F6J_A)                                     |
| 2FSA_B | FALZ(A/B)     | Apo     | 1.90 | 0.834 | 53 | 0.848 | 150.234 | 0.660 | 0.648 | 0.865 | 1.189 | 0.692 | 1.718 | 0.804 | 203, 204, 205, 209, 1007(2F6J_A)                                     |
| 2FSA_C | FALZ(A/B)     | Apo     | 1.90 | 0.762 | 51 | 0.733 | 147.147 | 0.673 | 0.643 | 0.782 | 0.471 | 0.995 | 0.473 | 0.492 | 349, 351, 355, 384, 1039(2F6J_A)                                     |
| 2RI7   | FALZ(A/B)     | Ligand  | 1.45 | 0.793 | 52 | 0.811 | 138.572 | 0.714 | 0.589 | 0.725 | 0.790 | 0.675 | 1.172 | 0.882 | 797, 799, 812, 820, 1007(2F6J_A)                                     |
| 3QZS_A | FALZ(A/B)     | Peptide | 1.80 | 0.986 | 91 | 1.015 | 141.316 | 0.435 | 0.689 | 0.992 | 0.977 | 0.905 | 1.079 | 0.680 | 175, 176, 180, 182, 189                                              |
| 3QZS_B | FALZ(A/B)     | Peptide | 1.80 | 0.940 | 80 | 0.961 | 141.659 | 0.490 | 0.677 | 0.972 | 0.952 | 0.877 | 1.086 | 0.753 | 175, 176, 180, 182, 190                                              |
| 3QZT   | FALZ(A/B)     | Peptide | 1.50 | 0.938 | 83 | 0.967 | 128.282 | 0.503 | 0.648 | 0.901 | 0.824 | 0.853 | 0.967 | 0.788 | 175, 177, 180, 181, 232                                              |
| 3QZV   | FALZ(A/B)     | Peptide | 2.00 | 0.890 | 71 | 0.892 | 137.200 | 0.500 | 0.677 | 0.961 | 0.835 | 0.938 | 0.890 | 0.450 | 193, 205, 207, 209, 217                                              |
| 3UV2   | FALZ(A/B)     | Ligand  | 1.58 | 0.921 | 71 | 0.930 | 124.166 | 0.510 | 0.705 | 1.018 | 1.244 | 0.876 | 1.421 | 0.634 | 12, 14, 15, 25, 26                                                   |
| 3D7C_B | GCN5L2        | Apo     | 2.06 | 0.976 | 82 | 1.012 | 163.954 | 0.457 | 0.690 | 0.970 | 1.028 | 0.776 | 1.324 | 0.502 | 18, 20, 21, 37, 56                                                   |
| 3IU5   | PB1(A/B/C)(1) | Apo     | 1.63 | 0.473 | 14 | 0.377 | 61.054  | 0.827 | 0.581 | 0.689 | 0.025 | 0.992 | 0.026 | 0.964 | 2, 3, 10, 11, 19                                                     |
| 3HMF   | PB1(A/B/C)(2) | Apo     | 1.63 | 0.751 | 27 | 0.752 | 113.190 | 0.654 | 0.681 | 0.898 | 1.321 | 0.447 | 2.958 | 0.712 | 22, 63, 77, 103, 5(3LJW_B)                                           |
| 3LJW_A | PB1(A/B/C)(2) | Apo     | 1.50 | 0.762 | 45 | 0.726 | 112.504 | 0.567 | 0.679 | 0.966 | 0.837 | 0.959 | 0.874 | 0.959 | 3, 21, 43, 59, 406                                                   |
| 3LJW_B | PB1(A/B/C)(2) | Apo     | 1.50 | 0.756 | 46 | 0.747 | 113.876 | 0.649 | 0.617 | 0.826 | 0.751 | 0.800 | 0.940 | 0.656 | 2, 5, 52, 53, 388                                                    |
| 3G0J_A | PB1(A/B/C)(5) | Apo     | 1.78 | 0.794 | 31 | 0.771 | 75.117  | 0.483 | 0.759 | 1.103 | 2.192 | 0.637 | 3.443 | 0.554 | 12, 36, 53, 166, 221                                                 |
| 3MB4_A | PB1(A/B/C)(5) | Ligand  | 1.66 | 0.704 | 18 | 0.678 | 79.919  | 0.617 | 0.723 | 0.969 | 1.673 | 0.476 | 3.518 | 0.770 | 15, 20, 71, 78, 132                                                  |
| 3MB4_B | PB1(A/B/C)(5) | Ligand  | 1.66 | 0.808 | 37 | 0.786 | 85.750  | 0.549 | 0.749 | 1.035 | 1.549 | 0.722 | 2.146 | 0.578 | 16, 18, 26, 37, 50                                                   |

|        |              |         |      |       |     |       |         |       |       |       |       |       |       |       |                                                    |
|--------|--------------|---------|------|-------|-----|-------|---------|-------|-------|-------|-------|-------|-------|-------|----------------------------------------------------|
| 3GG3_B | PCAF         | Apo     | 2.25 | 1.032 | 103 | 1.084 | 162.582 | 0.452 | 0.678 | 0.900 | 0.864 | 0.807 | 1.071 | 0.702 | 7, 19, 34, 87, 88                                  |
| 3MB3   | PHIP(2)      | Ligand  | 2.25 | 0.866 | 71  | 0.869 | 145.775 | 0.587 | 0.643 | 0.833 | 0.358 | 0.947 | 0.378 | 0.756 | 25, 27, 29, 34, 151                                |
| 2GRC   | SMARCA4      | Apo     | 1.50 | 0.715 | 36  | 0.658 | 97.412  | 0.514 | 0.696 | 0.937 | 1.116 | 0.992 | 1.125 | 1.147 | 2, 3, 11, 13                                       |
| 3UVD   | SMARCA4      | Ligand  | 1.85 | 0.720 | 33  | 0.545 | 84.035  | 0.522 | 0.746 | 1.010 | 0.665 | 1.358 | 0.490 | 0.707 | 2, 4, 19, 58                                       |
| 1EQF   | TAF1(A/B)(1) | Apo     | 2.10 | 0.724 | 41  | 0.689 | 120.393 | 0.643 | 0.644 | 0.849 | 0.557 | 0.918 | 0.606 | 0.409 | 13, 14, 16, 18, 20                                 |
| 3UV5   | TAF1(A/B)(1) | Apo     | 2.03 | 0.685 | 36  | 0.628 | 117.306 | 0.640 | 0.659 | 0.927 | 0.693 | 1.016 | 0.682 | 0.530 | 34, 72, 120, 128, 158                              |
| 1EQF   | TAF1(A/B)(2) | Apo     | 2.10 | 0.873 | 72  | 0.886 | 162.239 | 0.586 | 0.631 | 0.918 | 0.728 | 0.889 | 0.819 | 0.729 | 1, 5, 7, 21, 321                                   |
| 3UV4_B | TAF1(A/B)(2) | Ligand  | 1.89 | 0.979 | 79  | 1.002 | 155.379 | 0.436 | 0.728 | 1.058 | 1.097 | 0.829 | 1.323 | 0.588 | 3, 10, 22, 26, 262                                 |
| 3UV4_B | TAF1(A/B)(2) | Ligand  | 1.89 | 0.858 | 59  | 0.780 | 154.693 | 0.478 | 0.739 | 1.089 | 0.607 | 1.182 | 0.514 | 0.298 | 36, 39, 70, 245, 246                               |
| 3UV5   | TAF1(A/B)(2) | Apo     | 2.03 | 0.888 | 72  | 0.892 | 148.176 | 0.510 | 0.667 | 0.973 | 0.638 | 0.937 | 0.680 | 0.434 | 11, 16, 33, 82, 165                                |
| 3HMH   | TAFIL(2)     | Apo     | 2.05 | 0.760 | 43  | 0.728 | 148.862 | 0.659 | 0.678 | 0.895 | 0.644 | 0.907 | 0.709 | 0.207 | 3, 5, 8, 12, 35                                    |
| 2YYN_A | TRIM24       | Apo     | 2.50 | 0.645 | 23  | 0.602 | 74.431  | 0.657 | 0.646 | 0.842 | 0.595 | 0.726 | 0.820 | 0.539 | 138, 146, 150, 156,<br>147(2YYN_B)                 |
| 2YYN_B | TRIM24       | Apo     | 2.50 | 0.702 | 37  | 0.706 | 83.006  | 0.697 | 0.562 | 0.687 | 0.574 | 0.622 | 0.923 | 0.705 | 136, 147, 138(2YYN_A),<br>146(2YYN_A), 156(2YYN_A) |
| 2YYN_C | TRIM24       | Apo     | 2.50 | 0.643 | 30  | 0.625 | 93.982  | 0.758 | 0.559 | 0.711 | 0.599 | 0.690 | 0.869 | 1.606 | 136, 145, 138(2YYN_A),<br>146(2YYN_A), 147(2YYN_B) |
| 2YYN_D | TRIM24       | Apo     | 2.50 | 0.702 | 35  | 0.725 | 89.523  | 0.729 | 0.534 | 0.648 | 1.025 | 0.463 | 2.213 | 0.817 | 139, 150, 151, 146(2YYN_A),<br>147(2YYN_B)         |
| 3O33_A | TRIM24       | Apo     | 2.00 | 0.690 | 30  | 0.657 | 79.576  | 0.639 | 0.648 | 0.905 | 0.848 | 0.756 | 1.121 | 0.469 | 109, 111, 117, 127, 121(3O33_D)                    |
| 3O33_B | TRIM24       | Apo     | 2.00 | 0.679 | 26  | 0.639 | 80.948  | 0.653 | 0.670 | 0.962 | 0.731 | 0.745 | 0.981 | 1.098 | 115, 135, 136, 139, 130(3O33_D)                    |
| 3O33_C | TRIM24       | Apo     | 2.00 | 0.718 | 30  | 0.709 | 73.745  | 0.630 | 0.641 | 0.813 | 0.902 | 0.582 | 1.549 | 0.893 | 107, 120, 124, 126, 130(3O33_D)                    |
| 3O33_D | TRIM24       | Apo     | 2.00 | 0.761 | 50  | 0.761 | 116.277 | 0.675 | 0.589 | 0.806 | 0.622 | 0.787 | 0.790 | 0.722 | 108, 115, 118, 121, 130                            |
| 3O35_A | TRIM24       | Peptide | 1.76 | 0.648 | 30  | 0.610 | 89.866  | 0.714 | 0.603 | 0.820 | 0.526 | 0.817 | 0.644 | 2.197 | 100, 102, 112, 113, 131                            |
| 3O35_B | TRIM24       | Peptide | 1.76 | 0.796 | 50  | 0.827 | 135.142 | 0.718 | 0.576 | 0.805 | 0.744 | 0.562 | 1.324 | 1.048 | 100, 101, 120, 130, 198                            |
| 3O36_A | TRIM24       | Peptide | 1.70 | 0.684 | 32  | 0.674 | 92.267  | 0.738 | 0.588 | 0.797 | 0.578 | 0.645 | 0.897 | 1.372 | 104, 108, 116, 122, 144                            |
| 3O36_B | TRIM24       | Peptide | 1.70 | 0.770 | 50  | 0.765 | 122.108 | 0.675 | 0.609 | 0.776 | 0.764 | 0.812 | 0.942 | 0.713 | 103, 106, 139, 145, 166                            |
| 3O37_B | TRIM24       | Apo     | 2.00 | 0.605 | 26  | 0.570 | 83.006  | 0.790 | 0.562 | 0.703 | 0.403 | 0.758 | 0.531 | 1.039 | 108, 109, 144, 150, 134(3O37_D)                    |

<sup>a</sup>Water molecules included from structures other than indicated with PDB code for structure from which they were taken in brackets. UID's correspond to numbering from the other structure.



**Table S4.** Output from SiteMap for structures that have been excluded from Figure 4 Figure 5 and Table 1(see main text), but have been subsequently used in analysis. Details of water molecules included where appropriate.

| PDB    | BRD           | Bound State | Res. (Å) | SiteScore | Size | Dscore | Volume  | Exposure | Enclosure | Contact | Phobic | Philic | Balance | Don/Acc | Water UID's <sup>a</sup>                      |
|--------|---------------|-------------|----------|-----------|------|--------|---------|----------|-----------|---------|--------|--------|---------|---------|-----------------------------------------------|
| 3MQM_A | ASH1L         | Apo         | 2.54     | 0.866     | 43   | 0.790  | 79.576  | 0.317    | 0.874     | 1.435   | 0.835  | 1.352  | 0.618   | 0.812   |                                               |
| 3MQM_B | ASH1L         | Apo         | 2.54     | 0.875     | 47   | 0.697  | 84.378  | 0.365    | 0.855     | 1.349   | 0.913  | 1.412  | 0.647   | 1.418   |                                               |
| 3LXJ_D | ATAD2B        | Apo         | 2.33     | 0.668     | 36   | 0.636  | 136.857 | 0.765    | 0.588     | 0.696   | 0.358  | 0.863  | 0.415   | 0.432   | 67, 68, 70, 1231(3DAI),<br>1253(3DAI)         |
| 2D9E_A | BRPF1B        | Apo         |          | 1.032     | 100  | 1.103  | 201.684 | 0.639    | 0.641     | 0.863   | 0.819  | 0.680  | 1.205   | 2.280   |                                               |
| 2D9E_B | BRPF1B        | Apo         |          | 1.011     | 82   | 1.052  | 162.582 | 0.523    | 0.726     | 0.996   | 1.388  | 0.719  | 1.931   | 1.585   |                                               |
| 2D9E_C | BRPF1B        | Apo         |          | 0.969     | 81   | 0.984  | 145.432 | 0.487    | 0.722     | 1.004   | 0.931  | 0.906  | 1.028   | 1.687   |                                               |
| 2D9E_D | BRPF1B        | Apo         |          | 1.001     | 82   | 1.043  | 140.973 | 0.523    | 0.711     | 1.012   | 1.361  | 0.720  | 1.891   | 2.206   |                                               |
| 2D9E_E | BRPF1B        | Apo         |          | 1.000     | 76   | 1.028  | 152.635 | 0.522    | 0.754     | 1.037   | 1.720  | 0.749  | 2.297   | 1.410   |                                               |
| 2D9E_F | BRPF1B        | Apo         |          | 1.046     | 92   | 1.100  | 164.640 | 0.533    | 0.717     | 1.018   | 1.514  | 0.711  | 2.129   | 1.569   |                                               |
| 2D9E_G | BRPF1B        | Apo         |          | 1.051     | 96   | 1.092  | 160.867 | 0.475    | 0.736     | 1.060   | 1.182  | 0.831  | 1.422   | 1.199   |                                               |
| 2D9E_H | BRPF1B        | Apo         |          | 1.037     | 89   | 1.084  | 155.722 | 0.486    | 0.726     | 1.017   | 1.555  | 0.730  | 2.130   | 2.505   |                                               |
| 2D9E_I | BRPF1B        | Apo         |          | 0.965     | 76   | 0.990  | 158.466 | 0.571    | 0.714     | 1.010   | 1.266  | 0.790  | 1.603   | 3.074   |                                               |
| 2D9E_J | BRPF1B        | Apo         |          | 0.988     | 87   | 1.015  | 155.722 | 0.547    | 0.705     | 0.992   | 1.045  | 0.874  | 1.196   | 1.665   |                                               |
| 2D9E_K | BRPF1B        | Apo         |          | 0.969     | 85   | 0.987  | 152.292 | 0.538    | 0.705     | 1.020   | 0.778  | 0.929  | 0.838   | 1.403   |                                               |
| 2D9E_L | BRPF1B        | Apo         |          | 0.951     | 65   | 0.964  | 130.683 | 0.492    | 0.755     | 1.053   | 1.417  | 0.756  | 1.873   | 2.034   |                                               |
| 2D9E_M | BRPF1B        | Apo         |          | 1.078     | 92   | 1.136  | 155.379 | 0.477    | 0.750     | 1.058   | 2.167  | 0.663  | 3.269   | 2.073   |                                               |
| 2D9E_N | BRPF1B        | Apo         |          | 1.067     | 88   | 1.122  | 162.239 | 0.500    | 0.755     | 1.037   | 1.649  | 0.653  | 2.526   | 1.660   |                                               |
| 2D9E_O | BRPF1B        | Apo         |          | 0.981     | 73   | 1.004  | 152.635 | 0.552    | 0.749     | 1.001   | 1.485  | 0.761  | 1.953   | 1.933   |                                               |
| 2D9E_P | BRPF1B        | Apo         |          | 0.870     | 67   | 0.858  | 156.065 | 0.599    | 0.689     | 0.932   | 0.260  | 0.996  | 0.261   | 1.918   |                                               |
| 2D9E_Q | BRPF1B        | Apo         |          | 0.980     | 88   | 1.010  | 166.012 | 0.542    | 0.688     | 0.899   | 0.775  | 0.875  | 0.886   | 2.050   |                                               |
| 2D9E_R | BRPF1B        | Apo         |          | 1.057     | 102  | 1.099  | 163.954 | 0.487    | 0.730     | 1.040   | 1.203  | 0.854  | 1.408   | 1.833   |                                               |
| 2D9E_S | BRPF1B        | Apo         |          | 1.036     | 79   | 1.073  | 158.466 | 0.466    | 0.776     | 1.068   | 1.437  | 0.700  | 2.054   | 1.016   |                                               |
| 2D9E_T | BRPF1B        | Apo         |          | 0.997     | 92   | 1.043  | 156.751 | 0.572    | 0.668     | 0.903   | 0.714  | 0.797  | 0.895   | 1.845   |                                               |
| 3K2J_A | PB1(A/B/C)(3) | Apo         | 2.20     | 0.623     | 23   | 0.553  | 96.040  | 0.689    | 0.669     | 0.842   | 0.751  | 0.918  | 0.818   | 0.665   | 23, 46, 3(3LJW_A),<br>43(3LJW_A), 406(3LJW_A) |
| 3K2J_B | PB1(A/B/C)(3) | Apo         | 2.20     | 0.653     | 25   | 0.595  | 96.040  | 0.632    | 0.674     | 0.868   | 0.954  | 0.857  | 1.113   | 0.611   | 3, 20, 55, 43(3LJW_A),<br>406(3LJW_A)         |
| 3TLP_A | PB1(A/B/C)(4) | Apo         | 2.13     | 0.717     | 41   | 0.687  | 112.161 | 0.650    | 0.626     | 0.870   | 0.804  | 0.892  | 0.900   | 0.404   | 2, 15, 20, 43, 406(3LJW_A)                    |
| 3TLP_B | PB1(A/B/C)(4) | Apo         | 2.13     | 0.727     | 41   | 0.706  | 112.847 | 0.680    | 0.621     | 0.803   | 0.768  | 0.822  | 0.933   | 0.477   | 7, 9, 54, 43(3TLP_A),<br>406(3LJW_A)          |

|        |          |         |      |       |     |       |         |       |       |       |       |       |       |       |                                            |
|--------|----------|---------|------|-------|-----|-------|---------|-------|-------|-------|-------|-------|-------|-------|--------------------------------------------|
| 2DAT_A | SMARCA2B | Apo     |      | 0.893 | 57  | 0.880 | 126.910 | 0.500 | 0.759 | 1.039 | 1.237 | 0.876 | 1.412 | 0.951 |                                            |
| 2DAT_B | SMARCA2B | Apo     |      | 0.882 | 51  | 0.868 | 136.171 | 0.500 | 0.770 | 1.044 | 1.235 | 0.815 | 1.516 | 1.239 |                                            |
| 2DAT_C | SMARCA2B | Apo     |      | 0.952 | 65  | 0.938 | 145.089 | 0.414 | 0.809 | 1.105 | 1.106 | 0.936 | 1.181 | 0.994 |                                            |
| 2DAT_D | SMARCA2B | Apo     |      | 0.873 | 92  | 0.798 | 174.587 | 0.699 | 0.552 | 0.804 | 0.198 | 1.334 | 0.149 | 0.811 |                                            |
| 2DAT_E | SMARCA2B | Apo     |      | 0.828 | 51  | 0.674 | 112.504 | 0.510 | 0.754 | 1.076 | 0.574 | 1.380 | 0.416 | 1.060 |                                            |
| 2DAT_F | SMARCA2B | Apo     |      | 0.880 | 53  | 0.874 | 119.707 | 0.485 | 0.744 | 1.006 | 1.538 | 0.787 | 1.954 | 1.173 |                                            |
| 2DAT_G | SMARCA2B | Apo     |      | 0.869 | 57  | 0.755 | 115.934 | 0.441 | 0.771 | 1.063 | 0.914 | 1.278 | 0.715 | 0.984 |                                            |
| 2DAT_H | SMARCA2B | Apo     |      | 0.812 | 47  | 0.654 | 109.074 | 0.548 | 0.762 | 1.033 | 0.618 | 1.375 | 0.449 | 0.880 |                                            |
| 2DAT_I | SMARCA2B | Apo     |      | 0.877 | 60  | 0.852 | 119.364 | 0.429 | 0.748 | 1.008 | 1.342 | 0.996 | 1.347 | 1.651 |                                            |
| 2DAT_J | SMARCA2B | Apo     |      | 0.792 | 45  | 0.711 | 112.161 | 0.545 | 0.748 | 1.046 | 1.036 | 1.131 | 0.916 | 1.394 |                                            |
| 2DAT_K | SMARCA2B | Apo     |      | 0.760 | 43  | 0.701 | 110.103 | 0.583 | 0.717 | 0.941 | 0.433 | 1.060 | 0.409 | 0.912 |                                            |
| 2DAT_L | SMARCA2B | Apo     |      | 0.903 | 57  | 0.867 | 121.765 | 0.367 | 0.814 | 1.192 | 1.847 | 1.016 | 1.817 | 1.138 |                                            |
| 2DAT_M | SMARCA2B | Apo     |      | 0.841 | 47  | 0.815 | 120.736 | 0.539 | 0.755 | 1.026 | 1.044 | 0.868 | 1.202 | 1.018 |                                            |
| 2DAT_N | SMARCA2B | Apo     |      | 0.836 | 49  | 0.702 | 117.992 | 0.505 | 0.782 | 1.067 | 0.383 | 1.304 | 0.293 | 1.031 |                                            |
| 2DAT_O | SMARCA2B | Apo     |      | 0.796 | 43  | 0.674 | 101.185 | 0.511 | 0.770 | 1.188 | 0.923 | 1.239 | 0.745 | 0.934 |                                            |
| 2DAT_P | SMARCA2B | Apo     |      | 0.864 | 52  | 0.818 | 137.886 | 0.458 | 0.799 | 1.121 | 0.829 | 1.040 | 0.797 | 1.126 |                                            |
| 2DAT_Q | SMARCA2B | Apo     |      | 0.849 | 52  | 0.827 | 128.968 | 0.552 | 0.736 | 0.986 | 1.037 | 0.899 | 1.154 | 1.302 |                                            |
| 2DAT_R | SMARCA2B | Apo     |      | 0.814 | 42  | 0.776 | 117.649 | 0.533 | 0.763 | 1.072 | 1.464 | 0.892 | 1.641 | 0.673 |                                            |
| 2DAT_S | SMARCA2B | Apo     |      | 0.841 | 54  | 0.812 | 121.765 | 0.550 | 0.732 | 0.964 | 0.801 | 0.974 | 0.823 | 1.043 |                                            |
| 2DAT_T | SMARCA2B | Apo     |      | 0.869 | 49  | 0.845 | 111.475 | 0.473 | 0.780 | 1.067 | 1.226 | 0.862 | 1.423 | 0.743 |                                            |
| 3O34   | TRIM24   | Peptide | 1.90 | 0.965 | 112 | 1.018 | 315.217 | 0.718 | 0.589 | 0.802 | 0.602 | 0.845 | 0.713 | 1.378 | 101, 107, 110, 121, 185                    |
| 3O37_A | TRIM24   | Apo     | 2.00 | 0.904 | 86  | 0.949 | 268.912 | 0.774 | 0.566 | 0.742 | 0.453 | 0.805 | 0.563 | 1.277 | 103, 113, 128, 150(3O37_B),<br>134(3O37_D) |
| 3O37_C | TRIM24   | Apo     | 2.00 | 0.903 | 88  | 0.946 | 251.419 | 0.760 | 0.564 | 0.720 | 0.334 | 0.842 | 0.397 | 1.083 | 104, 115, 150, 144(3O37_B),<br>150(3O37_B) |
| 3O37_D | TRIM24   | Apo     | 2.00 | 0.799 | 66  | 0.823 | 182.476 | 0.751 | 0.535 | 0.728 | 0.357 | 0.803 | 0.445 | 1.054 | 105, 106, 122, 134,<br>150(3O37_B)         |

<sup>a</sup>Water molecules included from structures other than indicated with PDB code for structure from which they were taken in brackets. UID's correspond to numbering from the other structure.

**Table S5.** Eight identified binding site residues, representative PDB code and median druggability for each bromodomain.

| Bromodomain           | Structure <sup>a</sup> | W81 | L92 | L94 | N140 | D144 | D145 | I146 | M149 | Median Dscore          |
|-----------------------|------------------------|-----|-----|-----|------|------|------|------|------|------------------------|
| BRD2(1)               | 1X0J                   | W   | L   | L   | N    | D    | D    | I    | M    | 0.87                   |
| BRD2(2)               | 3ONI                   | W   | L   | L   | N    | H    | D    | I    | M    | 0.90                   |
| BRD3(1)               | 2NXB                   | W   | L   | L   | N    | D    | D    | I    | M    | 0.86                   |
| BRD3(2)               | 2OO1                   | W   | L   | L   | N    | H    | E    | I    | M    | 0.94                   |
| BRD4(A/B)(1)          | 2OSS                   | W   | L   | L   | N    | D    | D    | I    | M    | 0.93                   |
| BRD4(A/B)(2)          | 2OOU                   | W   | L   | L   | N    | H    | E    | I    | M    | 0.87                   |
| BRDT(A/B)(1)          | -                      | W   | L   | L   | N    | D    | D    | I    | M    |                        |
| BRDT(A/B)(2)          | -                      | W   | L   | L   | N    | H    | E    | I    | M    |                        |
| CECR2                 | 3NXB                   | W   | Y   | A   | N    | S    | E    | Y    | M    | 1.00                   |
| FALZ(A/B)             | 2F6J                   | W   | D   | A   | N    | S    | P    | F    | C    | 0.91                   |
| GCN5L2                | 3D7C                   | W   | E   | A   | N    | S    | E    | Y    | Y    | 1.01                   |
| PCAF                  | 3GG3                   | W   | E   | A   | N    | S    | E    | Y    | C    | 1.08                   |
| TAF1(A/B)(2)          | 1EQF                   | W   | F   | V   | N    | S    | Q    | Y    | T    | 0.89                   |
| TAF1L(2)              | 3HMH                   | W   | F   | V   | N    | S    | Q    | Y    | T    | 0.73                   |
| BRD1                  | 3RCW                   | R   | E   | V   | N    | T    | V    | F    | A    | 0.77                   |
| BRD7                  | -                      | A   | I   | A   | N    | T    | I    | Y    | A    |                        |
| BRD9                  | 3HME                   | G   | I   | A   | N    | T    | V    | Y    | L    | 0.82                   |
| BRPF1A                | -                      | N   | E   | V   | N    | T    | I    | F    | A    |                        |
| BRPF1B                | 2D9E <sup>c</sup>      | N   | E   | V   | N    | T    | I    | F    | A    | 0.91-0.97 <sup>d</sup> |
| BRPF3                 | -                      | H   | E   | V   | N    | T    | I    | F    | A    |                        |
| BAZ1A(A/B)            | -                      | W   |     | V   | N    | T    | S    | E    | A    |                        |
| BAZ1B                 | -                      | W   |     | A   | N    | S    | H    | V    | C    |                        |
| BAZ2A(A/B)            | -                      | W   |     | V   | N    | S    | E    | I    | A    |                        |
| BAZ2B                 | 3G0L                   | W   |     | V   | N    | S    | D    | I    | A    | 0.61                   |
| TRIM24                | 2YYN                   | L   |     | V   | N    | S    | E    | V    | A    | 0.67 <sup>e</sup>      |
| TRIM33B               | -                      | I   |     | I   | N    | S    | E    | V    | A    |                        |
| TRIM66 <sup>b</sup>   | -                      | L   |     | H   | N    | S    | E    | V    | A    |                        |
| PB1(A/B/C)(2)         | 3HMF                   | E   |     | Y   | N    | S    | Q    | V    | D    | 0.75                   |
| PB1(A/B/C)(3)         | 3K2J <sup>c</sup>      | E   |     | Y   | N    | S    | A    | I    | R    | 0.57 <sup>d</sup>      |
| PB1(A/B/C)(4)         | 3TLP <sup>c</sup>      | D   |     | Y   | N    | S    | Q    | V    | D    | 0.70 <sup>d</sup>      |
| PB1A(6)               | -                      | D   |     | F   | N    | S    | E    | I    | D    |                        |
| PHIP(2)               | 3MB3                   | E   | E   | Y   | T    | S    | R    | I    | M    | 0.87                   |
| WDR9(A/B)(2)          | -                      | E   | E   | Y   | T    | S    | K    | I    | M    |                        |
| BRWD3(1)              | -                      | S   | A   | Y   | N    | K    | A    | A    | V    |                        |
| PHIP(1)               | -                      | S   | A   | Y   | N    | K    | S    | A    | V    |                        |
| WDR9(A/B)(1)          | -                      | A   | T   | Y   | N    | R    | S    | A    | I    |                        |
| PB1(A/B/C)(5)         | 3G0J                   | A   | E   | L   | N    | S    | L    | I    | D    | 0.77                   |
| SMARCA2A              | -                      | E   | E   | L   | N    | S    | Q    | I    | D    |                        |
| SMARCA2B              | 2DAT <sup>c</sup>      | E   | E   | L   | N    | S    | Q    | I    | D    | 0.53-0.64 <sup>d</sup> |
| SMARCA4               | 2GRC                   | E   | E   | L   | N    | S    | L    | I    | D    | 0.60                   |
| ASH1L                 | 3MQM <sup>c</sup>      | A   | K   | N   | Y    | S    | P    | V    | D    |                        |
| MLL1 <sup>b</sup>     | -                      |     |     |     | D    | P    | E    | I    | A    |                        |
| LOC93349 <sup>b</sup> | -                      | S   | K   | I   | Y    | K    | D    | F    | M    |                        |
| PB1(A/B/C)(1)         | 3IU5                   | E   | N   | Q   | Y    | S    | P    | E    | A    | 0.38                   |
| SP100A <sup>b</sup>   | -                      | C   |     | E   | Y    | D    | K    | F    | L    |                        |
| SP110A <sup>b</sup>   | -                      |     | I   | R   | Y    | S    | D    | F    | V    |                        |
| SP110C <sup>b</sup>   | -                      | S   | I   | R   | Y    | S    | D    | F    | V    |                        |
| SP140A <sup>b</sup>   | -                      | S   | K   | I   | Y    | K    | D    | F    | M    |                        |
| ZMYND11(A/B)          | -                      | I   | K   | H   | Y    | S    | E    | Q    | I    |                        |
| CREBBP                | 3DWY                   | L   | L   | I   | N    | S    | R    | V    | F    | 0.75                   |
| EP300                 | 3I3J                   | L   | L   | I   | N    | S    | R    | V    | Y    | 0.72                   |
| ATAD2A                | -                      | R   | E   | V   | N    | D    | L    | I    | R    |                        |
| ATAD2B                | 3LXJ <sup>c</sup>      | N   | E   | V   | N    | D    | I    | I    | R    | 0.64 <sup>d</sup>      |
| TAF1 (1)              | 1EQF                   | Y   | V   | V   | N    | H    | S    | L    | I    | 0.66                   |

|                           |   |   |   |   |   |   |   |   |   |
|---------------------------|---|---|---|---|---|---|---|---|---|
| TAFIL (1)                 | - | H | V | V | N | H | S | L | I |
| BRD8(A/B)(1) <sup>b</sup> | - | N | I | A | N | H | D | V | M |
| BRD8B(2) <sup>b</sup>     | - | S | Q | A | N | H | H | V | M |
| BRWD3(2) <sup>b</sup>     | - | E |   |   | T | S | R | I | M |
| TRIM28 <sup>b</sup>       | - | R |   |   | T | A | D | V | I |
| TRIM33A <sup>b</sup>      | - | I |   | I | N | V | Q | V | D |
| PRKCBP1 <sup>b</sup>      | - | D | Q | H | N | H | K | L | I |

<sup>a</sup>Representative structure for bromodomain passing imposed filters, <sup>b</sup>Prediction of ZA loop residues difficult due to variation in length and lack of structure, <sup>c</sup>Structure did not pass imposed filters, but has been used in analysis, <sup>d</sup>Estimated Dscore from structures without conserved water molecules, <sup>e</sup>Median Dscore with four outliers removed (See Group 4 text)

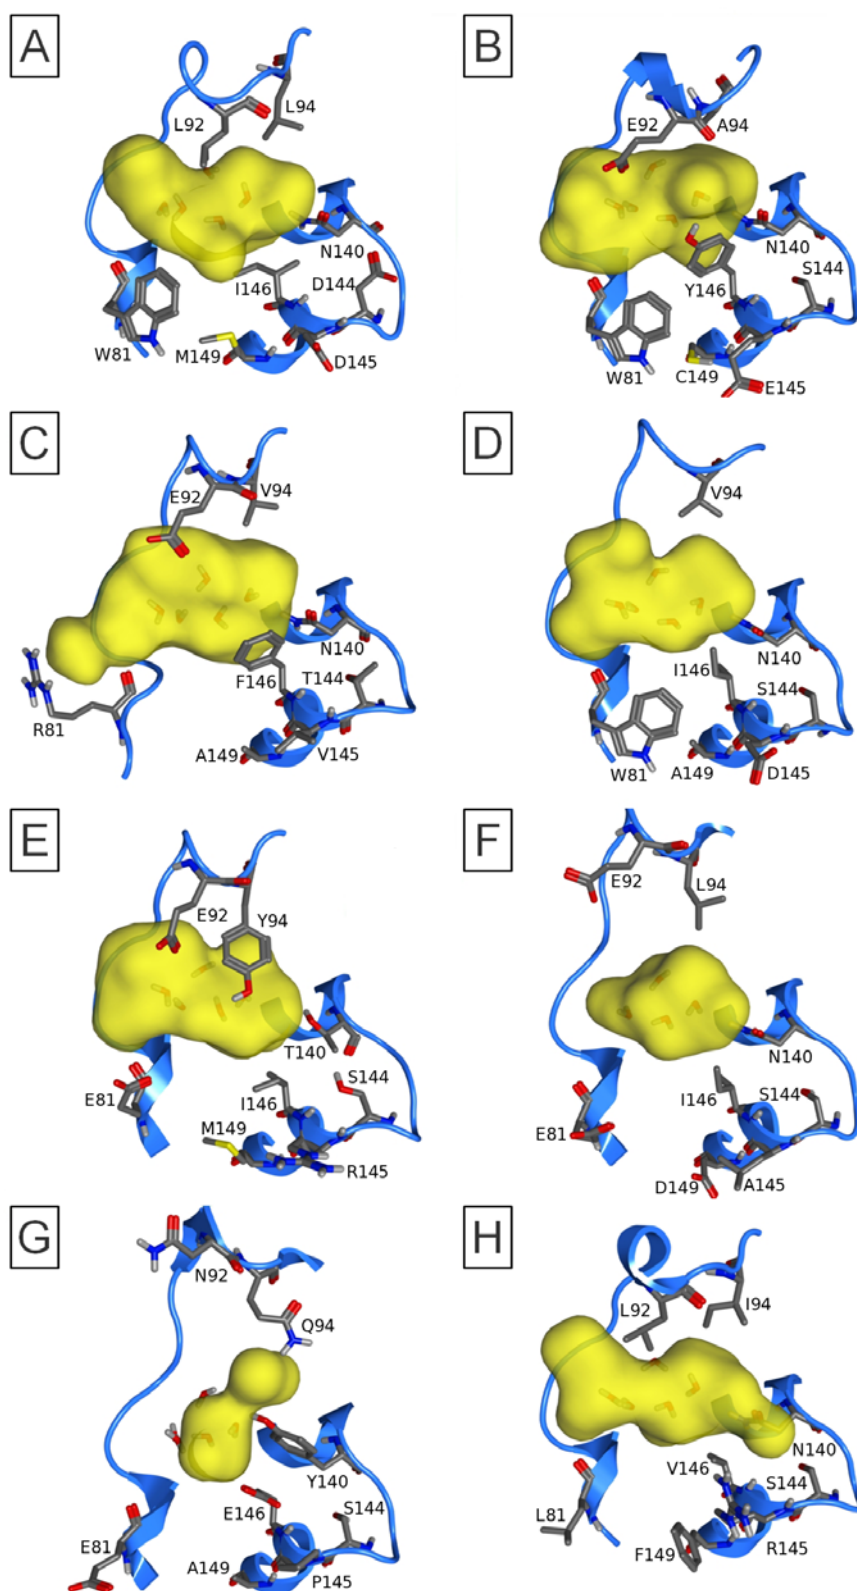

**Figure S1.** Eight binding site residues used in classification for representative bromodomain of each group and conserved water molecules. Pocket identified by SiteMap shown in yellow. All images captured from the same viewpoint. Bromodomain structures the same as Figure 9. (A) BRD4(A/B)(1)

PDB 3MXF structure representative of Group 1. (B) PCAF PDB 3GG3\_B structure representative of Group 2. (C) BRD1 PDB 3RCW\_A structure representative of Group 3. (D) BAZ2B PDB 3G0L structure representative of Group 4. (E) PHIP(2) PDB 3MB3 structure representative of Group 5. (F) SMARCA4 PDB 2GRC structure representative of Group 7. (G) PB1(A/B/C)(1) PDB 3IU5 structure representative of Group 8. (H) CREBBP PDB 3P1C\_B structure.
